# Supplementary material for: Photo-Responsive Carbon Capture over Metalloporphyrin-C60 Metal-Organic Frameworks via Charge-Transfer
Source: PubMed Central journal article supplement (PMC10595220; doi:10.34133/research.0261), 2023-10-24
Supplement: research.0261.f1.pdf [file research.0261.f1.pdf]

*Supplementary Information*

**Photo-Responsive Carbon Capture over Metalloporphyrin-C<sub>60</sub> Metal-Organic Frameworks via Charge-Transfer**

Shi-Chao Qi, Zhen Sun, Zhi-Hui Yang, Yun-Jie Zhao, Jia-Xin Li, Xiao-Qin Liu, and Lin-Bing Sun\*

State Key Laboratory of Materials-Oriented Chemical Engineering, Jiangsu National Synergetic Innovation Center for Advanced Materials (SICAM), College of Chemical Engineering, Nanjing Tech University, Nanjing, China, 211816.

\*Address correspondence to: [lbsun@njtech.edu.cn](mailto:lbsun@njtech.edu.cn) (L.B.S.)

## The related definitions and formulas:

(1) Definition of *ESP*:

$$ESP(\mathbf{r}) = \sum_N [Z_N/|\mathbf{r}-\mathbf{R}_N|] - \int [\rho(\mathbf{r}')/|\mathbf{r}-\mathbf{r}'|] d\mathbf{r}'$$

in which  $Z_N$  and  $\mathbf{R}_N$  are the nuclear charge and its location, respectively, and  $\rho(\mathbf{r}')$  means the electrons density.

(2) Definition of electron-hole distribution:

$$\rho_{\text{hole}}(\mathbf{r}) = \sum_{i \rightarrow m} c_{i \rightarrow m}^2 \varphi_i^2(\mathbf{r}) + \sum_{i \rightarrow m} \sum_{j \rightarrow m}^{i \neq j} c_{i \rightarrow m} c_{j \rightarrow m} \varphi_i(\mathbf{r}) \varphi_j(\mathbf{r})$$
$$\rho_{\text{electron}}(\mathbf{r}) = \sum_{i \rightarrow m} c_{i \rightarrow m}^2 \varphi_m^2(\mathbf{r}) + \sum_{i \rightarrow m} \sum_{i \rightarrow n}^{m \neq n} c_{i \rightarrow m} c_{i \rightarrow n} \varphi_m(\mathbf{r}) \varphi_n(\mathbf{r})$$

in which  $\varphi_i$  ( $\varphi_j$ ) and  $\varphi_m$  ( $\varphi_n$ ) represent the originally occupied and virtual molecular orbitals, respectively, and  $c$  is the configuration coefficient.

(3) Definition of electron-hole delocalization index (EDI & HDI):

$$EDI = 100 \sqrt{\int \rho_{\text{electron}}^2(\mathbf{r}) d\mathbf{r}} ; HDI = 100 \sqrt{\int \rho_{\text{hole}}^2(\mathbf{r}) d\mathbf{r}}$$

(4) Variation of  $\mu$  at  $c$ -axis with respect to ground state ( $\Delta\mu$ ):

$$\Delta\mu = \iint c \rho_{\text{hole}}(\mathbf{r}) dcd\mathbf{r} - \iint c \rho_{\text{electron}}(\mathbf{r}) dcd\mathbf{r}$$

in which  $c$  means the coordinates at  $c$ -axis direction.

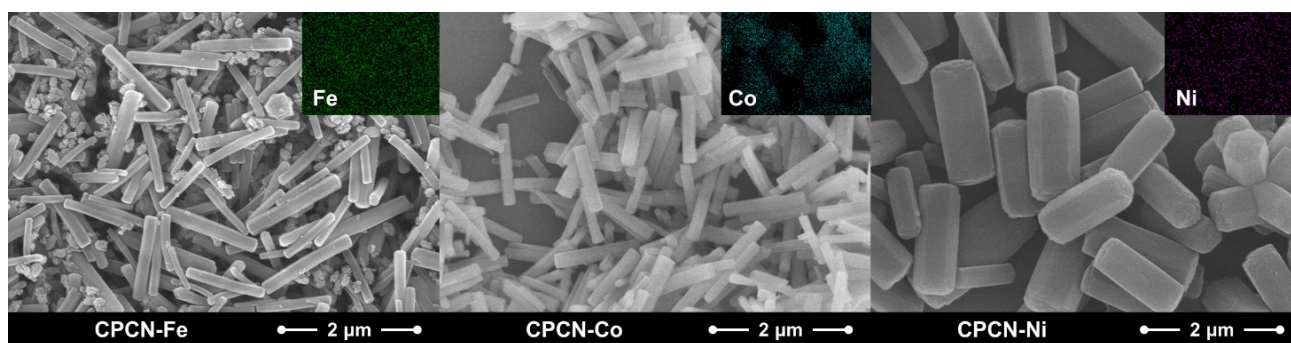

Fig. S1. The SEM images of CPCN-M samples.

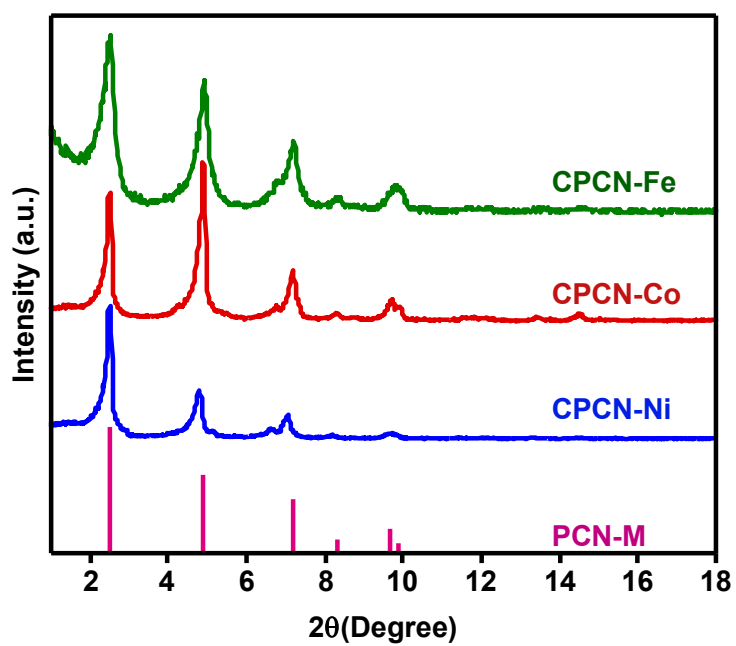

Fig. S2. The XRPD patterns of the CPCN-Ms and the pair distribution function of the PCN-M reported.

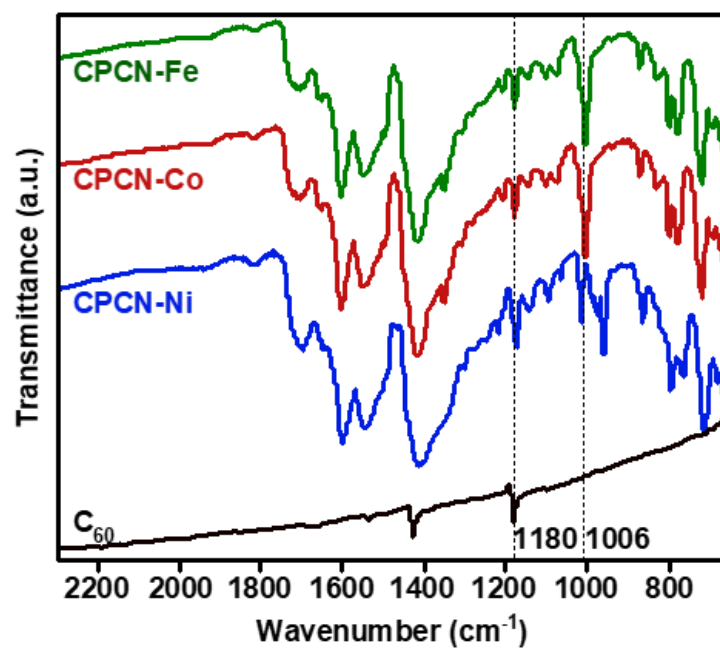

**Fig. S3.** The FTIR spectra of CPCN-Ms and C<sub>60</sub>.

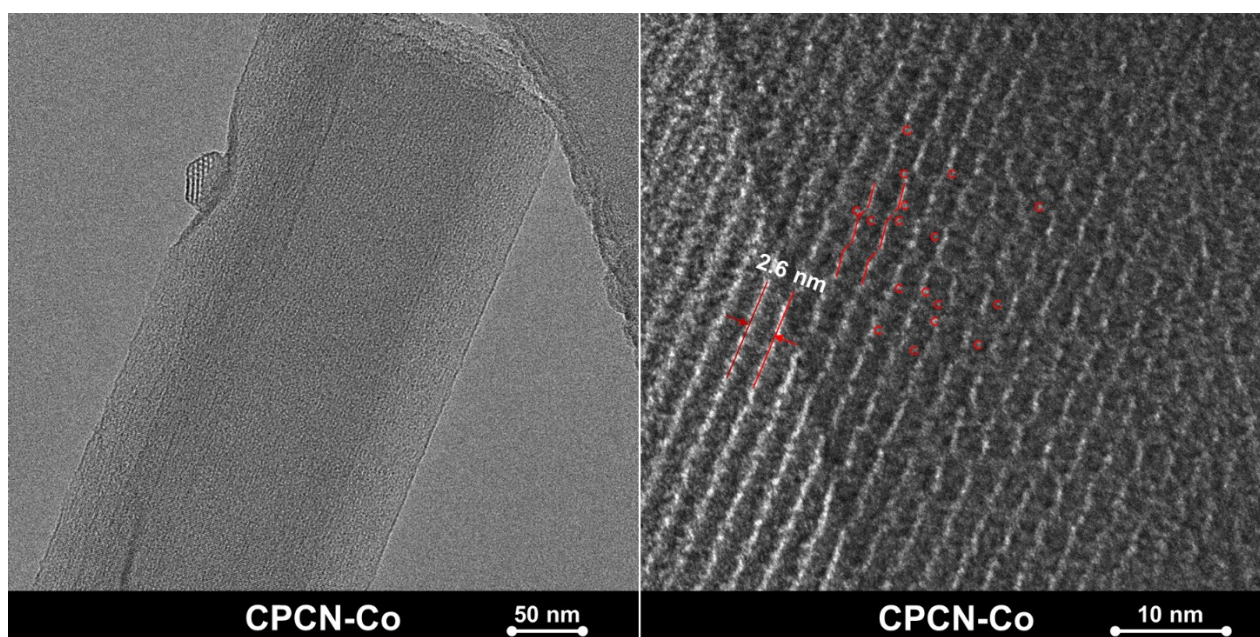

**Fig. S4.** The HREM images of the representative CPCN-Co. The red broken lines indicate the distorted lattice, and the red cycles indicate the doped C<sub>60</sub>.

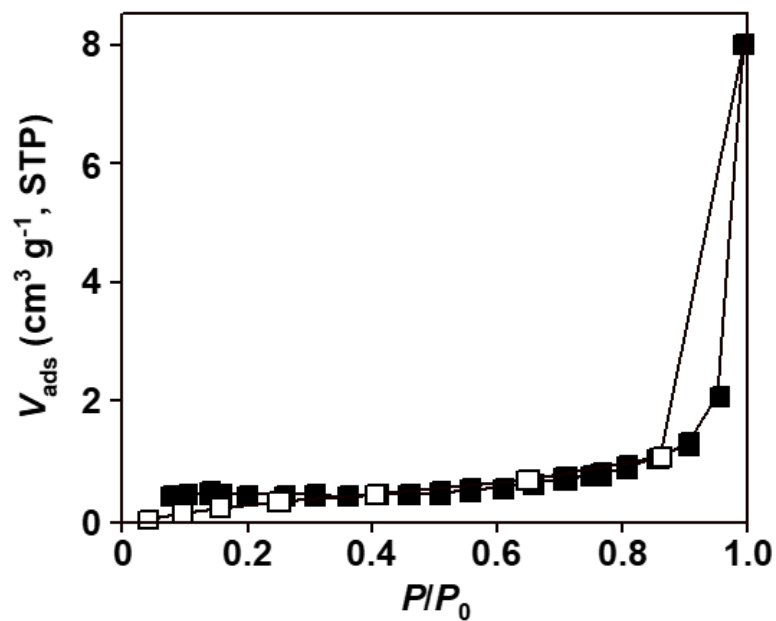

Fig. S5. The N<sub>2</sub> adsorption-desorption isotherm of the C<sub>60</sub>.

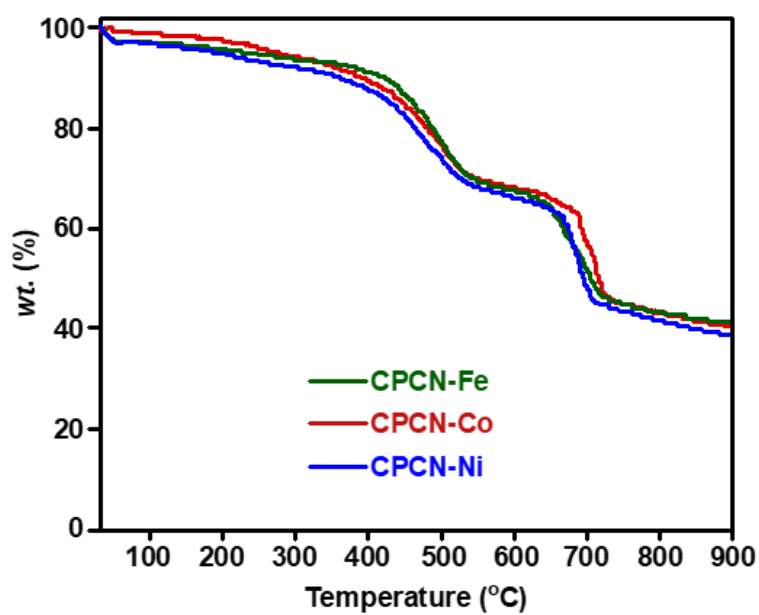

Fig. S6. The TG profiles of CPCN-M samples.

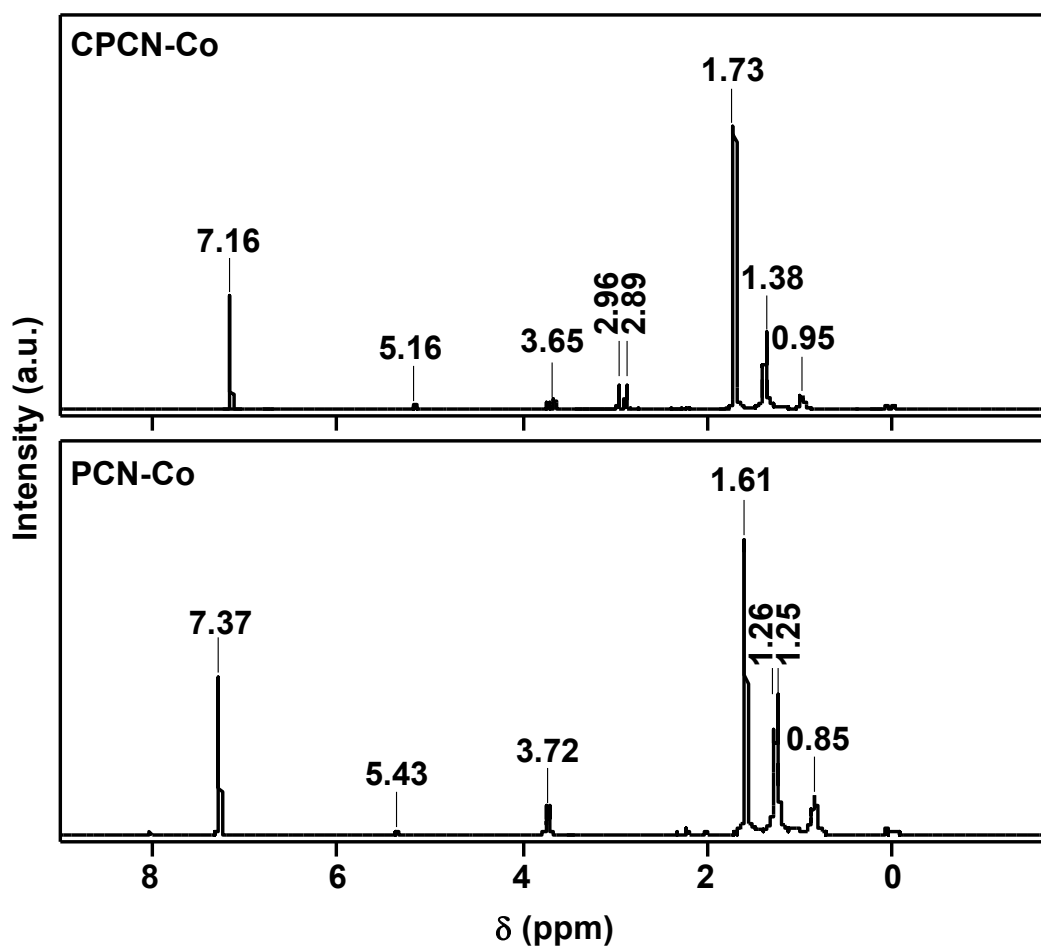

**Fig. S7.** The <sup>1</sup>H-NMR spectra of the representative CPCN-Co and its contrast PCN-Co. CPCN-Co ( $C_2D_6SO$ , 400 MHz):  $\delta$  2.89, 2.96, 3.65, 5.16, 7.16 (s, 8H, porphin ring-H),  $\delta$  1.73 (s, 8H, proximal phenyl-H),  $\delta$  0.95-1.38 (m, 8H, distal phenyl-H). PCN-Co ( $C_2D_6SO$ , 400 MHz):  $\delta$  3.72, 5.43, 7.37 (s, 8H, porphin ring-H),  $\delta$  1.61 (s, 8H, proximal phenyl-H),  $\delta$  0.85-1.26 (m, 8H, distal phenyl-H).

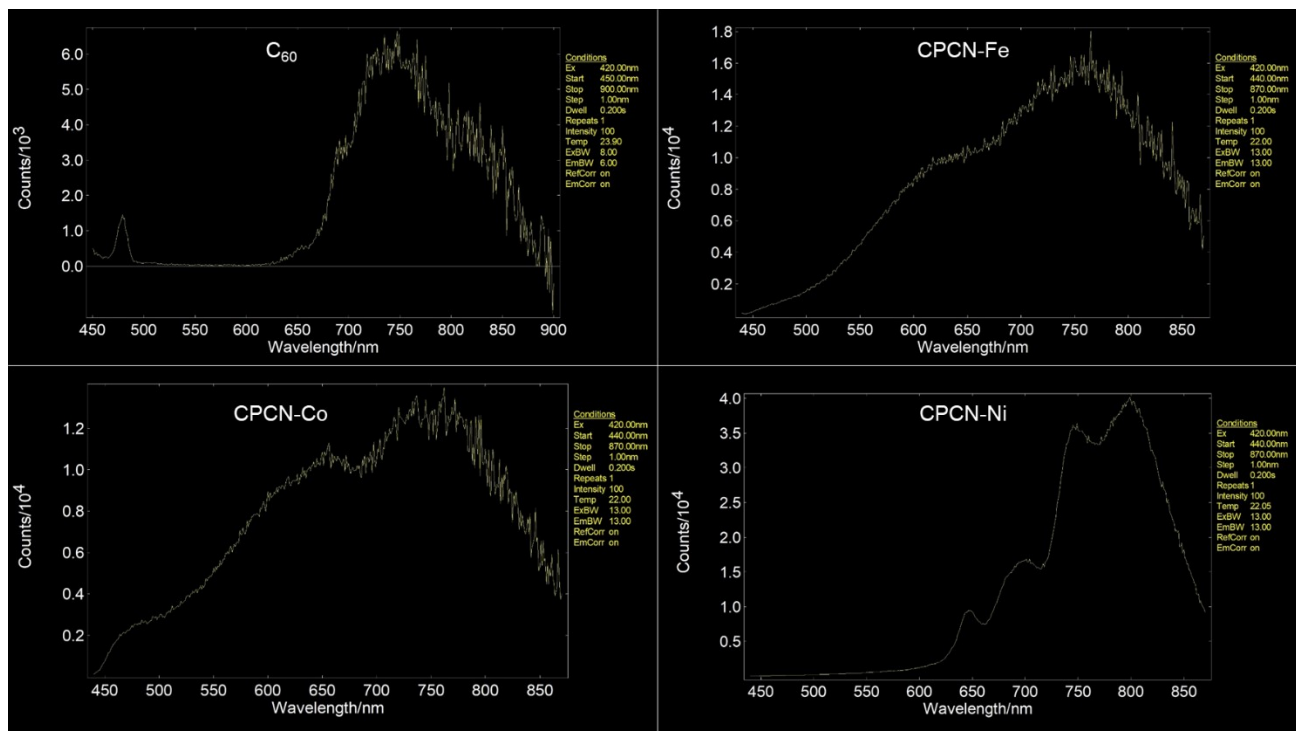

**Fig. S8.** The phosphorescent radiation spectra of solid samples excited with the Vis = 420 nm at ambient temperature.

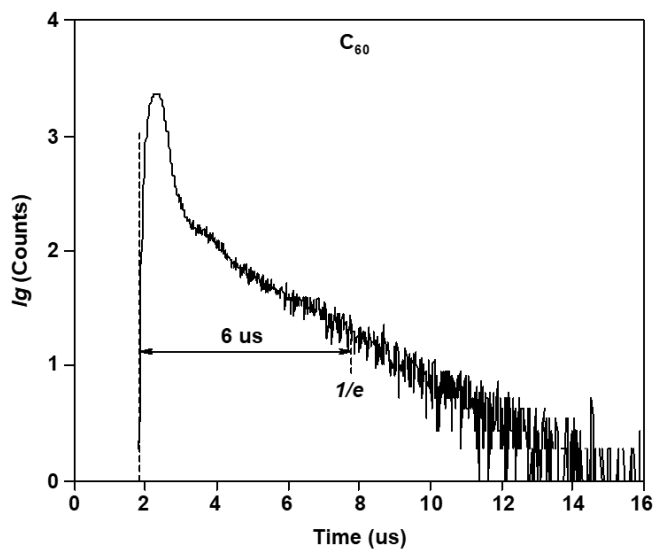

**Fig. S9.** The phosphor decay profile of the C<sub>60</sub> at 750 nm, in which the 1/e indicates the effective phosphorescence lifetime.

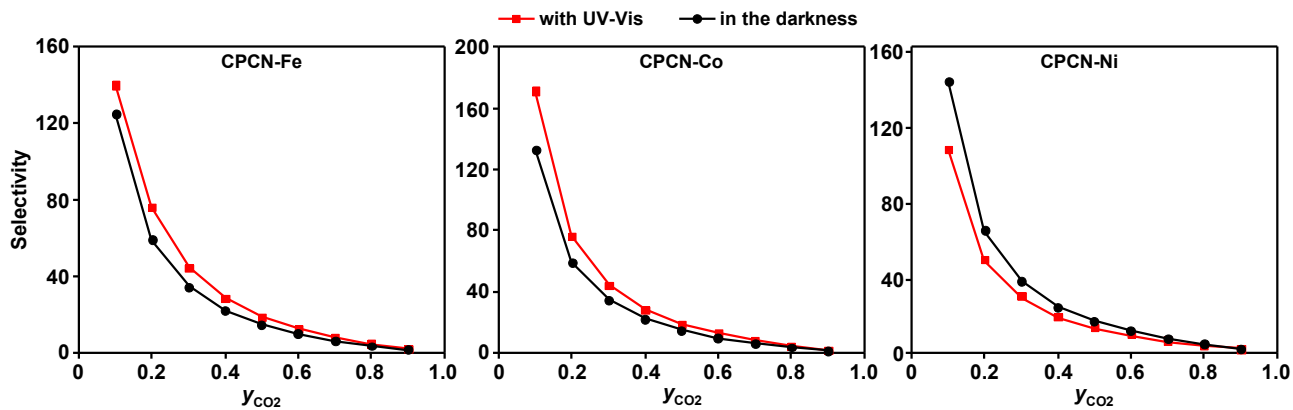

Fig. S10. The IAST selectivity of CO<sub>2</sub> towards N<sub>2</sub> at 0 °C and 1 bar.

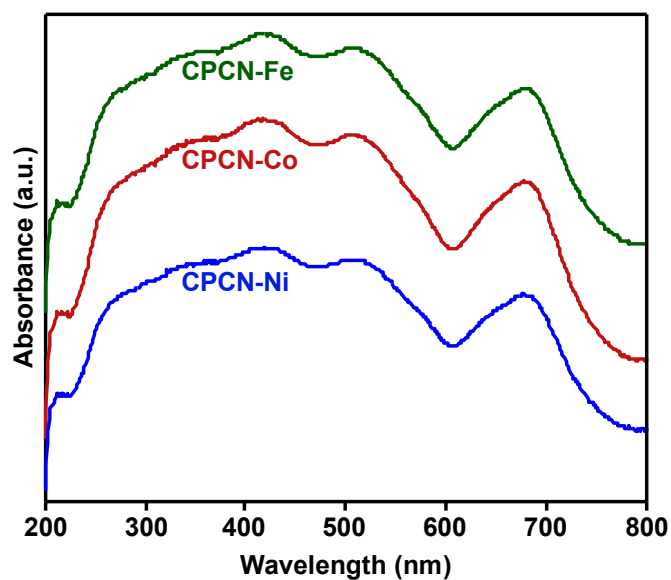

Fig. S11. The UV-Vis absorption spectra of solid samples.



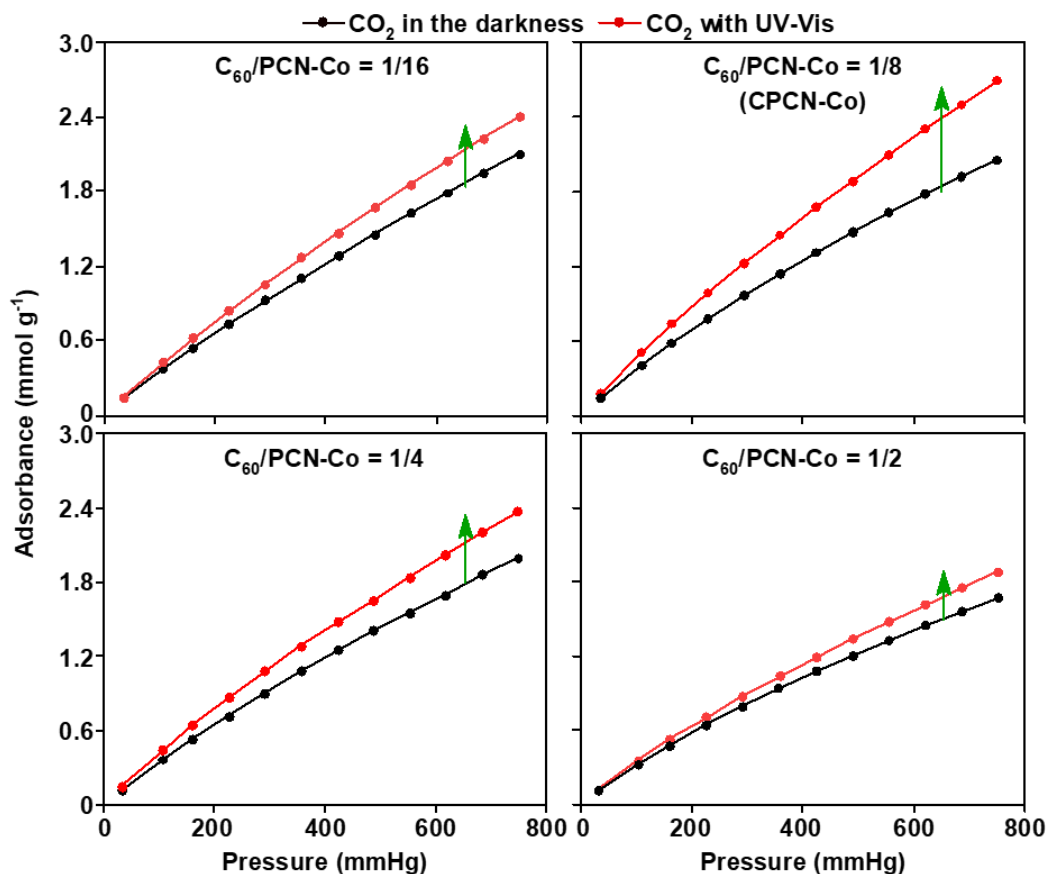

**Fig. S12.** The static adsorption isotherms of CO<sub>2</sub> tested with UV-Vis irradiation and in the darkness over the CPCN-Co samples with different mass ratios of C<sub>60</sub>/PCN-Co at 0 °C, in which the green arrows indicate the variation trend of the UV-Vis CO<sub>2</sub> adsorption isotherm with respect to that in the darkness.

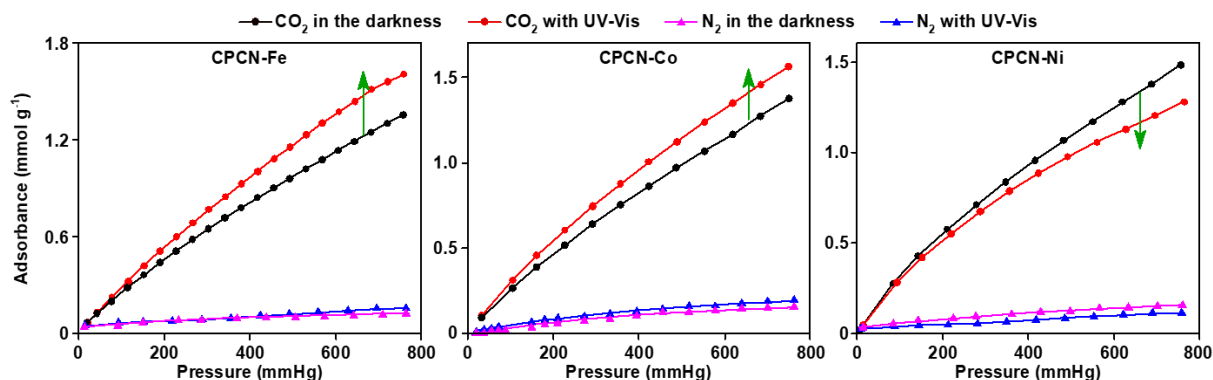

**Fig. S13.** The static adsorption isotherms of CO<sub>2</sub> and N<sub>2</sub> tested with UV-Vis irradiation and in the darkness over the CPCN-Ms at 25 °C, in which the green arrows indicate the variation trend of the UV-Vis CO<sub>2</sub> adsorption isotherm with respect to that in the darkness.

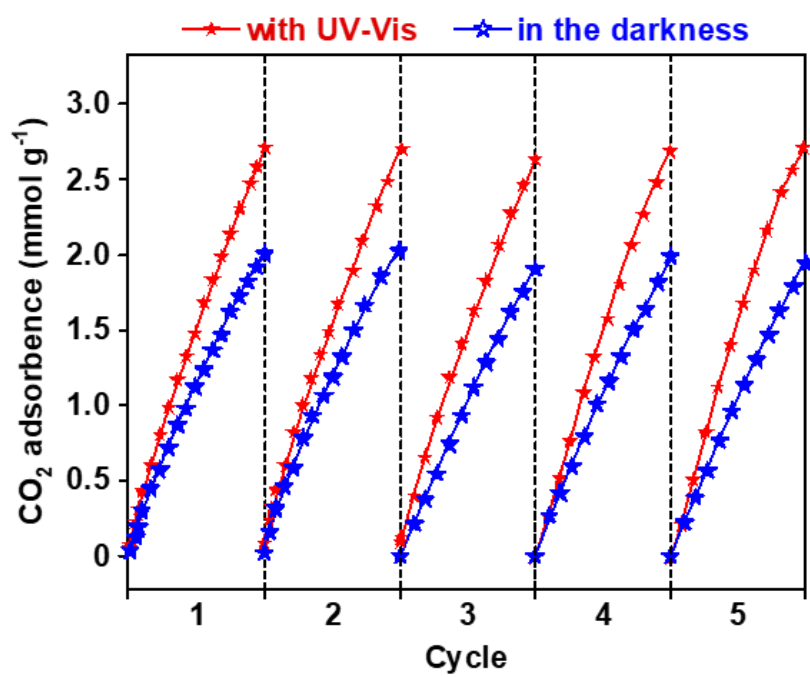

**Fig. S14.** The recyclability test for the representative CPCN-Co.

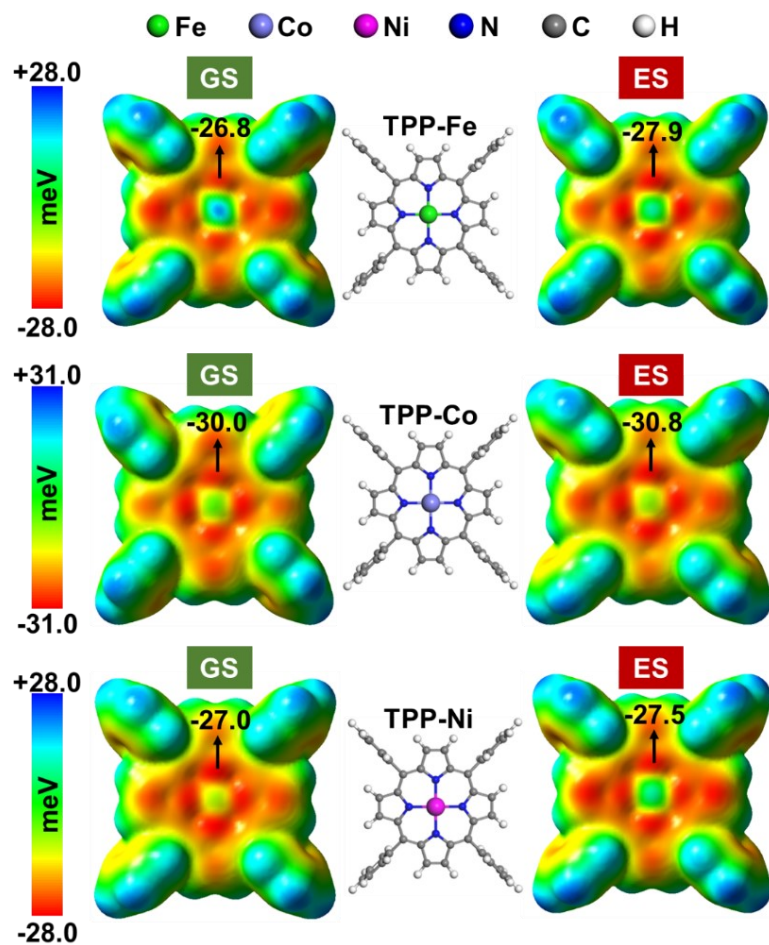

**Fig. S15.** The molecular surface ESPs of the TPP-M with the density isovalue =  $1 \times 10^{-3}$  at GS and at ES.

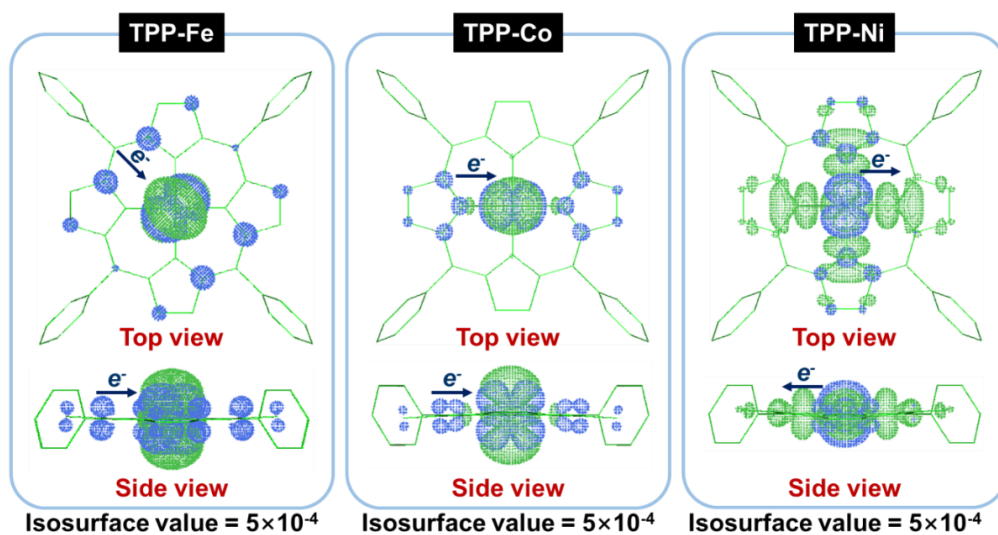

**Fig. S16.** The electron-hole distribution at ES of the TPP-M (green area: electrons distribution; blue area: holes distribution).

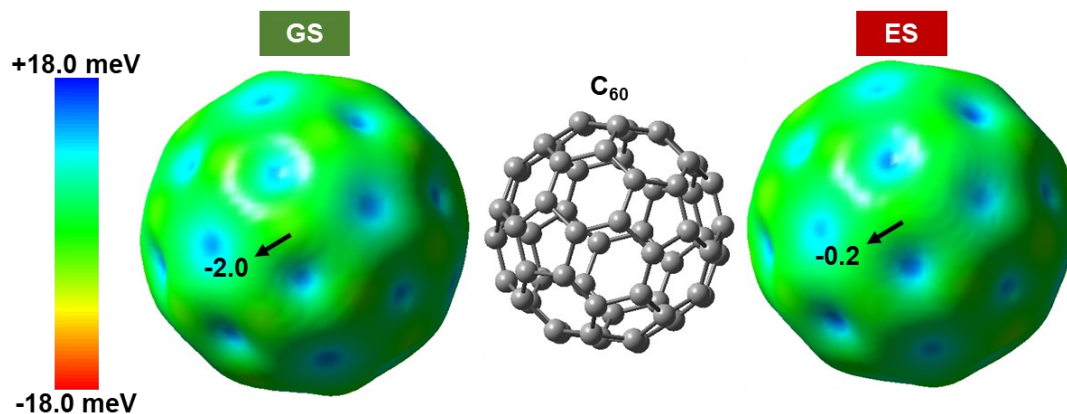

**Fig. S17.** The molecular surface ESPs of C<sub>60</sub> with the density isovalue =  $1 \times 10^{-3}$  at GS and at ES.

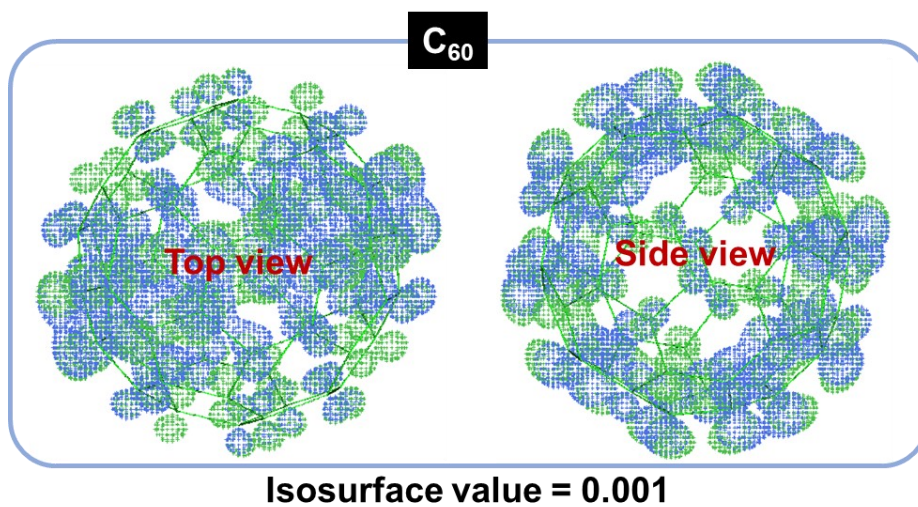

**Fig. S18.** The electron-hole distribution at ES of C<sub>60</sub> (green area: electrons distribution; blue area: holes distribution).

**Table S1.** The textural properties of CPCN-Ms and the gas adsorption uptakes at 0 °C and 1 bar.

| <b>Sorbent</b> | <b><math>S_{\text{BET}}</math></b>  | <b><math>V_{\text{pore}}</math></b>  | <b>CO<sub>2</sub> uptake (mmol g<sup>-1</sup>)</b> |               | <b>N<sub>2</sub> uptake (mmol g<sup>-1</sup>)</b> |               |
|----------------|-------------------------------------|--------------------------------------|----------------------------------------------------|---------------|---------------------------------------------------|---------------|
|                | <b>m<sup>2</sup> g<sup>-1</sup></b> | <b>cm<sup>3</sup> g<sup>-1</sup></b> | <b>Pristine</b>                                    | <b>UV-Vis</b> | <b>Pristine</b>                                   | <b>UV-Vis</b> |
| CPCN-Fe        | 2100                                | 2.10                                 | 2.08                                               | 2.50          | 0.20                                              | 0.23          |
| CPCN-Co        | 2160                                | 2.15                                 | 2.05                                               | 2.69          | 0.14                                              | 0.20          |
| CPCN-Ni        | 2130                                | 2.06                                 | 2.43                                               | 1.99          | 0.13                                              | 0.12          |

**Table S2.** The CO<sub>2</sub> adsorption performances and the deforming units of some representative photo-responsive sorbents during the past decade.

| Sorbent                           | Deforming unit                                 | $S_{\text{BET}}$ (m <sup>2</sup> g <sup>-1</sup> ) | CO <sub>2</sub> adsorption      |                          |              | Ref.      |
|-----------------------------------|------------------------------------------------|----------------------------------------------------|---------------------------------|--------------------------|--------------|-----------|
|                                   |                                                |                                                    | Uptake (mmol g <sup>-1</sup> )  | <i>R.C.</i> <sup>a</sup> | T, P         |           |
| PCN-123                           | 2-(Phenyldiazenyl)terephthalate                | --                                                 | 1.02 (no light) / 0.75 (UV)     | -26%                     | 22°C, 1 bar  | 19        |
| ECUT-15                           | 4,4'-Diazene-1,2-diylidibenzoate acid          | --                                                 | 0.26 (no light) / 0.14 (UV)     | -46%                     | 25 °C, 1 bar | 20        |
| Zn(AzDC)(4,4'-BPE) <sub>0.5</sub> | 4,4'-Dicarboxylate                             | 126                                                | 1.23(no light) / 0.53 (UV-Vis)  | -57%                     | 30 °C, 1 bar | 45        |
| azo-IRMOF-10                      | 2-Azobenzene-4,4'-biphenyldicarboxylate        | 4086                                               | 0.71 (no light) / 0.65 (UV)     | -8%                      | 25 °C, 1 bar | 46        |
| Azo-DMOF-1                        | 2-(Phenyldiazenyl)terephthalate                | 581                                                | 3.26 (no light) / 1.61 (UV)     | -51%                     | 0 °C, 1 bar  | 47        |
| A <sub>2</sub> P <sub>2</sub> @MS | 4-(3-Triethoxysilylpropyl-ureido)azobenzene    | 797                                                | 2.55 (Vis) / 1.65 (UV)          | -35%                     | 0 °C, 1 bar  | 48        |
| Azo-COP-2                         | Cross-coupling 1,2-di- <i>p</i> -tolylidiazene | 554                                                | 2.12 (no light) / 1.66 (UV)     | -22%                     | 0 °C, 1 bar  | 49        |
| P <sub>3</sub> /azoMOF            | Grafted azobenzene                             | 324                                                | 2.94 (Vis) / 2.21 (UV)          | -25%                     | 25 °C, 1 bar | 50        |
| SP/CTA <sup>+</sup> /Mont         | Spiropyran                                     | ~1                                                 | 0.43 (no light) / 0 (UV)        | -100%                    | 27 °C, 1 bar | 51        |
| HCPs@Azo                          | Azobenzene                                     | 984                                                | 1.68 (Vis) / 2.54 (UV)          | +51%                     | 0 °C, 1 bar  | 52        |
| CPCN-Co                           | Nondeforming                                   | 2160                                               | 2.05 (no light) / 2.69 (UV-Vis) | +31%                     | 0 °C, 1 bar  | This work |
| CPCN-Fe                           | Nondeforming                                   | 2100                                               | 1.32 (no light) / 1.58 (UV-Vis) | +20%                     | 25 °C, 1 bar | This work |

*a*: *R.C.*, rate of change.

**Table S3.** The indexes of the excited states for the adsorption sites.

| <b>Index</b>                                                                             | <b>TPP-Fe</b> | <b>CTPP-Fe</b> | <b>TPP-Co</b> | <b>CTPP-Co</b> | <b>TPP-Ni</b> | <b>CTPP-Ni</b> |
|------------------------------------------------------------------------------------------|---------------|----------------|---------------|----------------|---------------|----------------|
| Hole contribution from the -M/%                                                          | 92.4          | 88.8           | 94.7          | 94.2           | 94.9          | 98.2           |
| Electron contribution from the -M/%                                                      | 101.2         | 91.4           | 100.6         | 95.9           | 71.3          | 70.8           |
| Difference between electron and hole/%                                                   | +8.8          | +2.6           | +5.9          | +1.7           | -23.6         | -27.4          |
| Hole delocalization index/a.u.                                                           | 39.4          | 33.4           | 45.0          | 44.1           | 49.5          | 46.6           |
| Electron delocalization index/a.u.                                                       | 36.4          | 32.1           | 40.8          | 39.7           | 42.0          | 41.9           |
| Variation of $\mu$ at <i>c</i> -axis with respect to ground state/ $\times 10^{-4}$ a.u. | 1.7           | 970.7          | 23.0          | 737.3          | 13.6          | 673.6          |
